# Supplementary material
Source: publisher figshare collection journal article supplement (https://tandf.figshare.com/articles/dataset/_/4608670)
Supplement: Supplementary file 1 [file 1]

# SUPPLEMENTAL DATA

**Table S1.** The cell growth inhibition effects of free siRNA nanoparticles groups, siNC-loaded nanoparticles groups and siSurvivin-loaded nanoparticles groups. (n=6)

| siRNA      | cellular growth inhibition(%) |                         |                          |
|------------|-------------------------------|-------------------------|--------------------------|
|            | N-2-NACC/siRNA                | OCMCS/N-2-HACC/siRNA NP | GOCMCS/N-2-HACC/siRNA NP |
| none       | 8.86±3.12                     | 8.54±3.70               | 9.46±3.53                |
| siNC       | 8.46±5.11                     | 8.07±3.92               | 7.57±0.86                |
| siSurvivin | 14.56±3.46                    | 10.82±3.26              | 29.74±3.30               |
