# Supplementary material
Source: publisher figshare collection journal article supplement (https://tandf.figshare.com/articles/dataset/_/4608670)
Supplement: Supplementary file 3 [file 1]

## **SUPPLEMENTAL DATA**

**Table S2.** Particle size and zeta potential of FITC-labeled GOCMCS/N-2-HACC nanoparticles and unlabeled formulation (n=3)

| Formulation     | Size<br>(nm $\pm$ SD) | Polydispersity<br>index( $\pm$ SD) | Zeta potential<br>(mV $\pm$ SD) |
|-----------------|-----------------------|------------------------------------|---------------------------------|
| FITC labeled NP | 151.4 $\pm$ 4.5       | 0.197 $\pm$ 0.023                  | -16.68 $\pm$ 1.33               |
| NP              | 132.5 $\pm$ 1.2       | 0.153 $\pm$ 0.037                  | -16.32 $\pm$ 0.46               |
