# Supplementary material
Source: publisher figshare collection journal article supplement (https://tandf.figshare.com/articles/dataset/_/4608670)
Supplement: Supplementary file 4 [file 1]

## SUPPLEMENTAL DATA

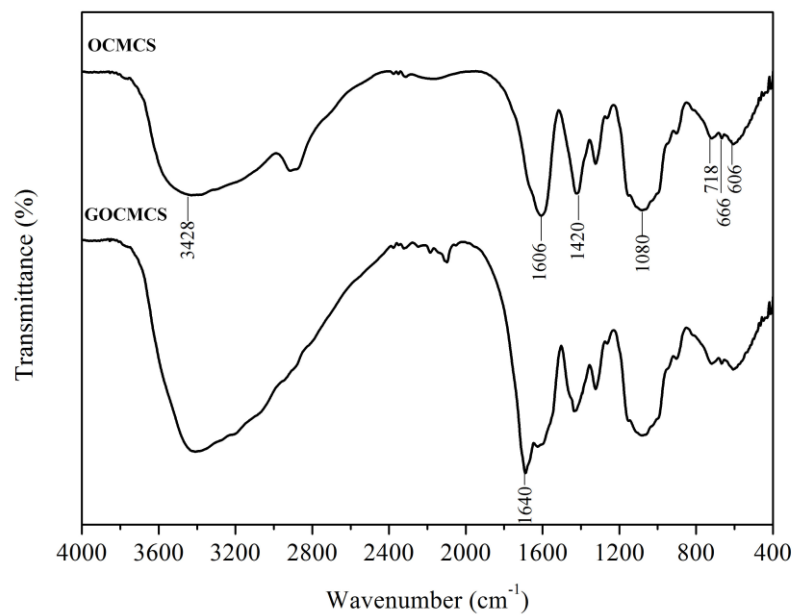

Figure S2(A)

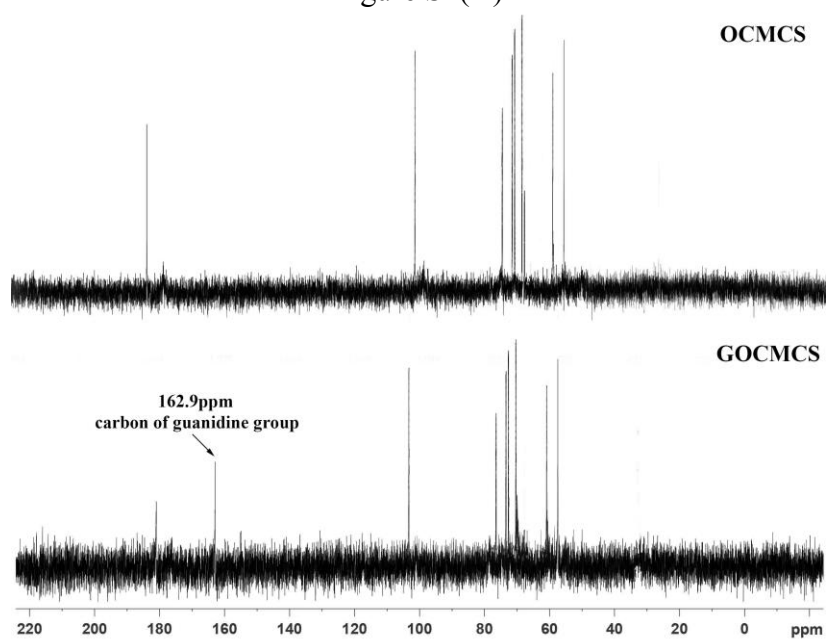

Figure S2(B)

**Figure S2.** Structure confirmation of GOCMCS. (A) Comparison on the FTIR spectra of OCMCS and GOCMCS. (B)  $^{13}\text{C}$  NMR spectra of OCMCS and GOCMCS.
