# Supplementary material
Source: publisher figshare collection journal article supplement (https://tandf.figshare.com/articles/dataset/_/4608670)
Supplement: Supplementary file 6 [file 1]

Archive with 5 entries (5 files):
- idrt_a_1278219_sm5027.pdf
- idrt_a_1278219_sm5026.pdf
- idrt_a_1278219_sm5020.pdf
- idrt_a_1278219_sm5015.pdf
- idrt_a_1278219_sm5012.pdf
