# Supplementary material
Source: publisher figshare collection journal article supplement (https://tandf.figshare.com/articles/dataset/_/4608670)

# SUPPLEMENTAL DATA

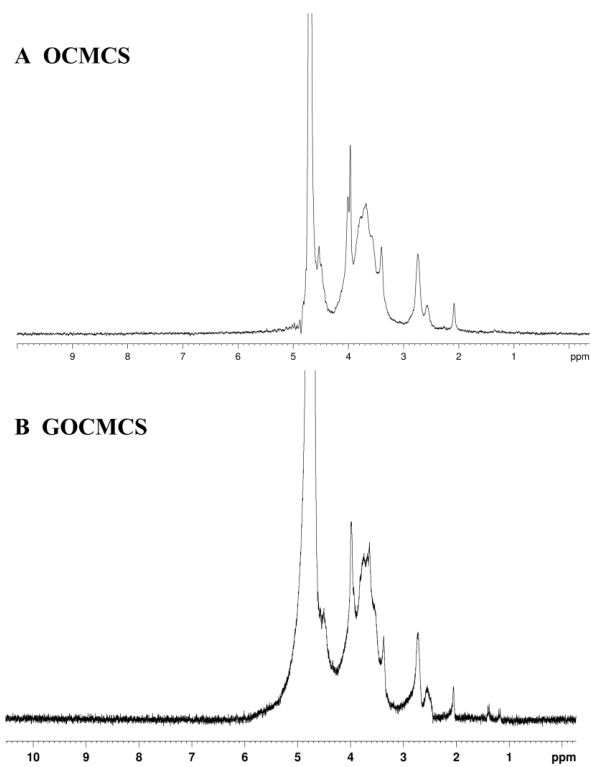

**Figure S3.**  $^1\text{H}$  NMR spectra of OCMCS and GOCMCS.

Supplement: Supplementary file 2 [file 1]

# SUPPLEMENTAL DATA

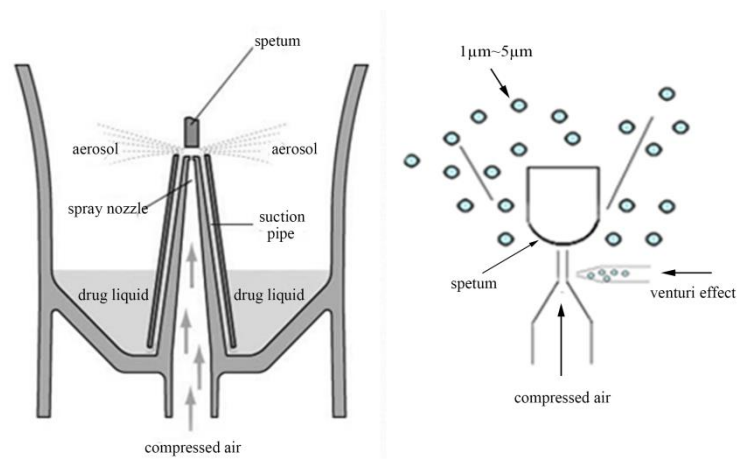

**Figure S1.** Schematic illustration of the Omron NE-C801 nebulizer.

Supplement: Supplementary file 5 [file 1]
